# Supplementary material for: Coriander (Coriandrum sativum) Cultivation Combined with Arbuscular Mycorrhizal Fungi Inoculation and Steel Slag Application Influences Trace Elements-Polluted Soil Bacterial Functioning
Source: MDPI journal article supplement (doi:10.3390/plants12030618), 2023-01-31
Supplement: s1 [file s1]

**Table S1.** Experimental design of plots describing all 20 modalities studied

| Modality       |             | Concentration (t/ha) |
|----------------|-------------|----------------------|
| Non-inoculated | Unvegetated | <i>Unamended</i>     |
|                |             | 1.5                  |
|                |             | 45                   |
|                |             | 1.5                  |
|                | Vegetated   | 45                   |
|                |             | 1.5                  |
|                |             | 45                   |
|                |             | 1.5                  |
| Inoculated     | Unvegetated | <i>Unamended</i>     |
|                |             | 1.5                  |
|                |             | 45                   |
|                |             | 1.5                  |
|                | Vegetated   | 45                   |
|                |             | 1.5                  |
|                |             | 45                   |
|                |             | 1.5                  |

**Table S2.** Influence of amendments and vegetation (V: vegetated, UV: unvegetated, NI: not-inoculated, I: inoculated, LS: ladle slag and OS: oven slag, NA: not-amended, 1.5 and 45 t.ha<sup>-1</sup>) on most abundant phyla relative abundance. One way ANOVA  $\pm$  standard error. Means followed by the same lowercase letter are not significantly different, by one-way ANOVA comparison and post-hoc Fisher test ( $\alpha = 0.05$ ).

| Phyla                    | V                  | UV                 | NI                 | I                  | LS                 | OS                 | NA                  | 1.5t.ha <sup>-1</sup> | 45t.ha <sup>-1</sup> |
|--------------------------|--------------------|--------------------|--------------------|--------------------|--------------------|--------------------|---------------------|-----------------------|----------------------|
| <i>Actinobacteria</i>    | 0.62 $\pm$ 0.013a  | 0.50 $\pm$ 0.013b  | 0.56 $\pm$ 0.02a   | 0.57 $\pm$ 0.02a   | 0.58 $\pm$ 0.019a  | 0.53 $\pm$ 0.019a  | 0.58 $\pm$ 0.027a   | 0.58 $\pm$ 0.019a     | 0.52 $\pm$ 0.019a    |
| <i>Proteobacteria</i>    | 0.18 $\pm$ 0.004b  | 0.20 $\pm$ 0.004a  | 0.19 $\pm$ 0.005a  | 0.19 $\pm$ 0.005a  | 0.20 $\pm$ 0.005a  | 0.19 $\pm$ 0.005b  | 0.17 $\pm$ 0.007b   | 0.19 $\pm$ 0.005ab    | 0.20 $\pm$ 0.005a    |
| <i>Gemmatimonadota</i>   | 0.06 $\pm$ 0.007b  | 0.14 $\pm$ 0.007a  | 0.10 $\pm$ 0.010a  | 0.10 $\pm$ 0.010a  | 0.09 $\pm$ 0.011a  | 0.11 $\pm$ 0.011a  | 0.10 $\pm$ 0.016a   | 0.09 $\pm$ 0.011a     | 0.12 $\pm$ 0.011a    |
| <i>Myxococcota</i>       | 0.046 $\pm$ 0.001a | 0.045 $\pm$ 0.001a | 0.044 $\pm$ 0.001a | 0.047 $\pm$ 0.001a | 0.044 $\pm$ 0.002a | 0.046 $\pm$ 0.002a | 0.048 $\pm$ 0.002a  | 0.62 $\pm$ 0.01a      | 0.62 $\pm$ 0.01a     |
| <i>Acidobacteriota</i>   | 0.018 $\pm$ 0.002b | 0.32 $\pm$ 0.002a  | 0.025 $\pm$ 0.01a  | 0.024 $\pm$ 0.01a  | 0.022 $\pm$ 0.002b | 0.029 $\pm$ 0.002a | 0.022 $\pm$ 0.003a  | 0.024 $\pm$ 0.002a    | 0.027 $\pm$ 0.002a   |
| <i>Bacteroidota</i>      | 0.016 $\pm$ 0.001b | 0.021 $\pm$ 0.001a | 0.019 $\pm$ 0.001a | 0.018 $\pm$ 0.001a | 0.017 $\pm$ 0.001b | 0.020 $\pm$ 0.001a | 0.017 $\pm$ 0.001a  | 0.017 $\pm$ 0.001a    | 0.020 $\pm$ 0.001a   |
| <i>Thermoplasmatota</i>  | 0.017 $\pm$ 0.001a | 0.016 $\pm$ 0.001a | 0.017 $\pm$ 0.001a | 0.017 $\pm$ 0.001a | 0.019 $\pm$ 0.001a | 0.014 $\pm$ 0.001b | 0.018 $\pm$ 0.002ab | 0.014 $\pm$ 0.001b    | 0.019 $\pm$ 0.001a   |
| <i>Patescibacteria</i>   | 0.008 $\pm$ 0.001a | 0.009 $\pm$ 0.001a | 0.008 $\pm$ 0.001a | 0.009 $\pm$ 0.001a | 0.009 $\pm$ 0.001a | 0.007 $\pm$ 0.001b | 0.009 $\pm$ 0.001a  | 0.007 $\pm$ 0.001b    | 0.009 $\pm$ 0.001a   |
| <i>Firmicutes</i>        | 0.007 $\pm$ 0.001b | 0.009 $\pm$ 0.001a | 0.008 $\pm$ 0.001a | 0.008 $\pm$ 0.001a | 0.008 $\pm$ 0.001a | 0.008 $\pm$ 0.001a | 0.009 $\pm$ 0.001a  | 0.007 $\pm$ 0.001b    | 0.009 $\pm$ 0.001a   |
| <i>Verrucomicrobiota</i> | 0.004 $\pm$ 0.001b | 0.006 $\pm$ 0.001a | 0.006 $\pm$ 0.001a | 0.005 $\pm$ 0.001a | 0.005 $\pm$ 0.001a | 0.006 $\pm$ 0.001a | 0.004 $\pm$ 0.001ab | 0.004 $\pm$ 0.001b    | 0.006 $\pm$ 0.001a   |
| <i>Nitrospirota</i>      | 0.004 $\pm$ 0.000b | 0.006 $\pm$ 0.000a | 0.005 $\pm$ 0.000a | 0.005 $\pm$ 0.000a | 0.004 $\pm$ 0.000a | 0.005 $\pm$ 0.000a | 0.005 $\pm$ 0.001a  | 0.005 $\pm$ 0.000a    | 0.005 $\pm$ 0.000a   |
| <i>Spirochaetota</i>     | 0.004 $\pm$ 0.000a | 0.004 $\pm$ 0.001a  | 0.003 $\pm$ 0.000a    | 0.005 $\pm$ 0.000a   |
| <i>Campylobacterota</i>  | 0.003 $\pm$ 0.000a | 0.002 $\pm$ 0.000a | 0.003 $\pm$ 0.000a  | 0.003 $\pm$ 0.000a    | 0.002 $\pm$ 0.000a   |
| <i>Planctomycetota</i>   | 0.001 $\pm$ 0.000b | 0.002 $\pm$ 0.000a | 0.001 $\pm$ 0.000a  | 0.002 $\pm$ 0.000a    | 0.002 $\pm$ 0.000a   |
| Others phyla             | 0.007 $\pm$ 0.000b | 0.011 $\pm$ 0.000a | 0.009 $\pm$ 0.000a | 0.008 $\pm$ 0.000a | 0.009 $\pm$ 0.001a | 0.009 $\pm$ 0.001a | 0.008 $\pm$ 0.001a  | 0.009 $\pm$ 0.001a    | 0.009 $\pm$ 0.001a   |

**Table S3.** Influence of amendments and vegetation (V: vegetated, UV: unvegetated, NI: not-inoculated, I: inoculated, LS: ladle slag and OS: oven slag, NA: not-amended, 1.5 and 45 t.ha<sup>-1</sup>) on biolog substrats family.

| State       | Amendment  | Dose<br>(t.ha <sup>-1</sup> ) | Inoculation | Carbohydrates | Amino acids | Carboxylic<br>acetic acids | Amines<br>amides | Polymers |
|-------------|------------|-------------------------------|-------------|---------------|-------------|----------------------------|------------------|----------|
| Unvegetated | Unamended  |                               | NI          | 998±254       | 658 ±185    | 908±109                    | 124±40           | 420±45   |
|             |            |                               | I           | 1119±231      | 735±120     | 924±136                    | 165±38           | 434±61   |
|             | Ladle slag | 1.5                           | NI          | 1092±665      | 607±102     | 889±220                    | 128±40           | 428±108  |
|             |            |                               | I           | 1382±377      | 883±103     | 1053±215                   | 207±89           | 519±39   |
|             |            | 45                            | NI          | 1006±268      | 741±66      | 885±135                    | 138±47           | 500±87   |
|             |            |                               | I           | 904±453       | 715±130     | 892±100                    | 158±51           | 426±77   |
|             | Oven slag  | 1.5                           | NI          | 929±233       | 754±131     | 1041±239                   | 181±34           | 425±69   |
|             |            |                               | I           | 727±43        | 751±210     | 936±219                    | 235±130          | 412±53   |
|             |            | 45                            | NI          | 718±447       | 650±54      | 821±177                    | 172±52           | 364±43   |
|             |            |                               | I           | 879±348       | 661±118     | 914±144                    | 123±60           | 421±70   |
| Vegetated   | Unamended  |                               | NI          | 1470±192      | 865±78      | 1105±48                    | 213±28           | 528±94   |
|             |            |                               | I           | 1710±311      | 876±115     | 1245±101                   | 207±53           | 553±129  |
|             | Ladle slag | 1.5                           | NI          | 1685±250      | 736±22      | 1230±159                   | 212±38           | 523±86   |
|             |            |                               | I           | 1612±302      | 785±163     | 1081±270                   | 193±32           | 567±127  |
|             |            | 45                            | NI          | 1371±459      | 823±112     | 1113±233                   | 225±25           | 460±85   |
|             |            |                               | I           | 1283±397      | 830±86      | 961±104                    | 179±53           | 529±81   |
|             | Oven slag  | 1.5                           | NI          | 1579±316      | 792±132     | 1065±146                   | 192±83           | 575±101  |
|             |            |                               | I           | 1479±219      | 767±116     | 1153±135                   | 226±42           | 505±113  |
|             |            | 45                            | NI          | 1851±137      | 690±99      | 1232±54                    | 182±32           | 620±126  |
|             |            |                               | I           | 1685±407      | 835±83      | 1237±142                   | 195±47           | 546±109  |
